# Supplementary material
Source: Springer Nature journal article supplement (https://www.springermedizin.de/resource/supplementary/13075_2009_2720_MOESM1_ESM.pdf/9692742)
Supplement: MOESM1 [file 9692742]

Assessed for eligibility  
(n= 95)

**Enrollment**

Randomized treatment allocation

Excluded (n= 2)  
Not meeting inclusion criteria  
(n= 3)  
Refused to participate  
(n= 9)  
Other reasons  
(n= 0)

Allocated to Phytalgic  
(n= 41)  
Received allocated intervention  
(n= 41)

**Allocation**

Allocated to Placebo  
(n=40)  
Received allocated intervention  
(n=40)

Lost to follow-up (n=0)  
Discontinued intervention (n= 1)  
Adverse event: diarrhea

**Follow-Up**

Lost to follow-up (n= 0)  
Discontinued intervention (n= 4)  
Lack of efficacy: 2  
Pregnancy: 1  
Adverse event: vomiting,  
epigastric pain (n=1)

Analyzed (n= 40)  
Excluded from analysis (n= 1)  
Did not complete study

**Analysis**

Analyzed (n= 36)  
Excluded from analysis (n= 4)  
did not complete study
